# Supplementary material for: Effects of Black Garlic Extract and Nanoemulsion on the Deoxy Corticosterone Acetate-Salt Induced Hypertension and Its Associated Mild Cognitive Impairment in Rats
Source: MDPI journal article supplement (doi:10.3390/antiox10101611), 2021-10-13
Supplement: s1 [file s1]

*Supplementary Information*

*for*

**Effects of black garlic extract and nanoemulsion on the deoxy  
corticosterone acetate-salt induced hypertension and its associated  
mild cognitive impairment in rats.**

**Chun-Yu Chen<sup>1,†</sup>, Tsung-Yu Tsai<sup>1,†</sup> and Bing-Huei Chen<sup>1,2,\*</sup>**

<sup>1</sup>Department of Food Science, Fu Jen Catholic University, New Taipei City 242, Taiwan.

<sup>2</sup>Department of Nutrition, China Medical University, Taichung 404, Taiwan

<sup>†</sup>Equally contributed to this article

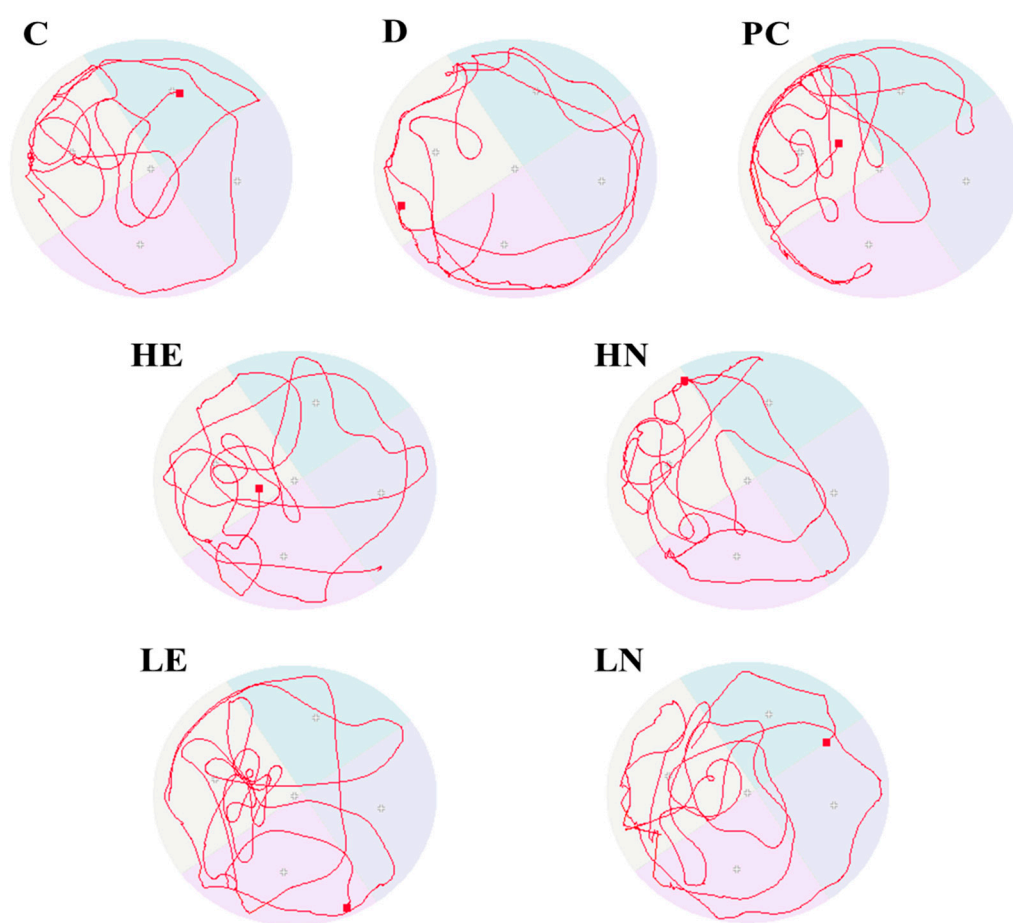

**Figure S1.** Effect of administration of black garlic extract and nanoemulsion on swimming pathways in Morris water maze in DOCA-salt induced hypertension and its associated mild cognitive impairment in rats. Data are presented as means  $\pm$  standard deviation (n=6); C, control; D, DOCA-salt at a dose 25 mg/kg BW; PC, DOCA-salt with administration of lisinopril at a dose 15 mg/kg BW; HE, DOCA-salt with administration of black garlic extract at a dose of 100 mg/kg BW; HN, DOCA-salt with administration of black garlic nanoemulsion at a dose of 100 mg/kg BW; LE, DOCA-salt with administration of black garlic extract at a dose of 50 mg/kg BW; LN, DOCA-salt with administration of black garlic nanoemulsion at a dose of 50 mg/kg BW.

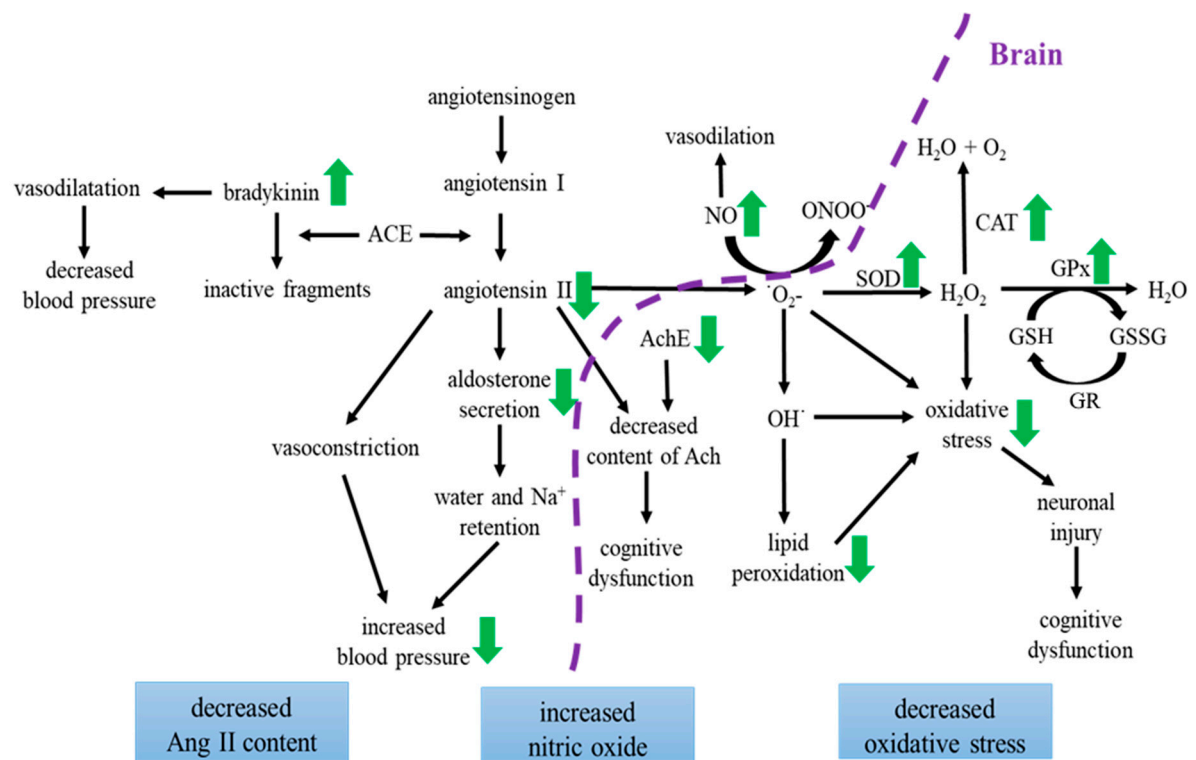

**Figure S2.** Proposed mechanism of black garlic extract and nanoemulsion to improve DOCA-salt induced hypertension and its associated mild cognitive impairment in rats.

**Table S1.** Particle size, polydispersity and zeta-potential of black garlic nanoemulsion during storage at 4°C for 90 days.

| storage time<br>(day) | particle size<br>(nm) <sup>a</sup> | polydispersity<br>index <sup>a</sup> | Zeta-potential<br>(mV) <sup>a</sup> |
|-----------------------|------------------------------------|--------------------------------------|-------------------------------------|
| 0                     | 10.8 ± 0.3 <sup>H</sup>            | 0.135 ± 0.031 <sup>AB</sup>          | -60.7 ± 2.2 <sup>ABCD</sup>         |
| 7                     | 11.3 ± 0.4 <sup>G</sup>            | 0.160 ± 0.028 <sup>A</sup>           | -62.6 ± 0.4 <sup>AB</sup>           |
| 14                    | 12.8 ± 0.3 <sup>BC</sup>           | 0.136 ± 0.012 <sup>AB</sup>          | -59.8 ± 2.3 <sup>ABCDE</sup>        |
| 21                    | 11.6 ± 0.2 <sup>FG</sup>           | 0.123 ± 0.024 <sup>BC</sup>          | -63.0 ± 2.5 <sup>A</sup>            |
| 28                    | 11.8 ± 0.1 <sup>EF</sup>           | 0.103 ± 0.014 <sup>CDE</sup>         | -61.8 ± 0.6 <sup>ABC</sup>          |
| 35                    | 12.3 ± 0.2 <sup>CD</sup>           | 0.116 ± 0.022 <sup>BCD</sup>         | -60.7 ± 0.7 <sup>ABCD</sup>         |
| 42                    | 12.1 ± 0.1 <sup>DEF</sup>          | 0.114 ± 0.013 <sup>BCD</sup>         | -59.1 ± 2.1 <sup>CDE</sup>          |
| 49                    | 12.3 ± 0.6 <sup>CDE</sup>          | 0.084 ± 0.006 <sup>E</sup>           | -57.5 ± 3.3 <sup>DEF</sup>          |
| 56                    | 11.8 ± 0.1 <sup>EF</sup>           | 0.099 ± 0.009 <sup>CDE</sup>         | -56.6 ± 1.6 <sup>EF</sup>           |
| 63                    | 12.8 ± 0.3 <sup>BC</sup>           | 0.125 ± 0.007 <sup>BC</sup>          | -57.0 ± 1.3 <sup>EF</sup>           |
| 70                    | 12.9 ± 0.2 <sup>B</sup>            | 0.113 ± 0.005 <sup>BCD</sup>         | -59.5 ± 1.3 <sup>BCDE</sup>         |
| 77                    | 13.5 ± 0.2 <sup>A</sup>            | 0.095 ± 0.008 <sup>DE</sup>          | -56.8 ± 1.4 <sup>EF</sup>           |
| 84                    | 13.0 ± 0.5 <sup>AB</sup>           | 0.106 ± 0.012 <sup>CDE</sup>         | -57.0 ± 1.3 <sup>EF</sup>           |
| 90                    | 12.7 ± 0.4 <sup>BC</sup>           | 0.134 ± 0.016 <sup>AB</sup>          | -55.6 ± 1.3 <sup>F</sup>            |

<sup>a</sup>Data shown are mean ± standard deviation (n = 3). Data with different capital letters (A-H) in the same column are significantly different at  $p < 0.05$ .

**Table S2.** Particle size, zeta-potential and polydispersity index changes as affected by black garlic nanoemulsion during heating at 40-100°C for varied time length (0.5-2.0 h)

| Temperature (°C)   | Particle size (nm) |       |       |       | Zeta-potential (mV) |       |       |       | Polydispersity index |       |       |       |
|--------------------|--------------------|-------|-------|-------|---------------------|-------|-------|-------|----------------------|-------|-------|-------|
|                    | 0.5 h              | 1.0 h | 1.5 h | 2.0 h | 0.5 h               | 1.0 h | 1.5 h | 2.0 h | 0.5 h                | 1.0 h | 1.5 h | 2.0 h |
| Control (unheated) | 11.2               |       |       |       | -61.3               |       |       |       | 0.130                |       |       |       |
| 40                 | 12.5               | 12.3  | 13.2  | 13.2  | -57.1               | -50.5 | -45.1 | -41.2 | 0.129                | 0.132 | 0.127 | 0.141 |
| 60                 | 13.7               | 13.1  | 13.7  | 13.5  | -49.5               | -40.1 | -35.0 | -30.6 | 0.136                | 0.132 | 0.129 | 0.134 |
| 80                 | 12.4               | 13.1  | 13.0  | 14.1  | -39.2               | -27.1 | -25.6 | -21.4 | 0.119                | 0.144 | 0.141 | 0.153 |
| 100                | 13.3               | 13.5  | 13.6  | 13.4  | -32.2               | -26.8 | -23.6 | -18.1 | 0.133                | 0.178 | 0.193 | 0.164 |

**Table S3.** Effect of administration of black garlic extract and nanoemulsion on body weight in DOCA-salt induced hypertension and its associated mild cognitive impairment in rats.

| group | body weight (g)       |                       |                       |                        |                        |                        |                        |
|-------|-----------------------|-----------------------|-----------------------|------------------------|------------------------|------------------------|------------------------|
|       | week 0                | week 1                | week 2                | week 3                 | week 4                 | week 5                 | week 6                 |
| C     | 255 ± 9 <sup>A</sup>  | 300 ± 15 <sup>A</sup> | 339 ± 18 <sup>A</sup> | 371 ± 20 <sup>A</sup>  | 393 ± 25 <sup>A</sup>  | 421 ± 28 <sup>A</sup>  | 446 ± 31 <sup>A</sup>  |
| D     | 256 ± 5 <sup>A</sup>  | 302 ± 10 <sup>A</sup> | 332 ± 14 <sup>A</sup> | 349 ± 28 <sup>A</sup>  | 369 ± 18 <sup>A</sup>  | 385 ± 35 <sup>A</sup>  | 406 ± 28 <sup>AB</sup> |
| PC    | 255 ± 8 <sup>A</sup>  | 302 ± 14 <sup>A</sup> | 331 ± 19 <sup>A</sup> | 358 ± 16 <sup>A</sup>  | 373 ± 21 <sup>A</sup>  | 400 ± 28 <sup>A</sup>  | 414 ± 28 <sup>AB</sup> |
| HE    | 255 ± 9 <sup>A</sup>  | 297 ± 12 <sup>A</sup> | 327 ± 16 <sup>A</sup> | 356 ± 18 <sup>A</sup>  | 374 ± 21 <sup>A</sup>  | 396 ± 21 <sup>A</sup>  | 406 ± 29 <sup>B</sup>  |
| HN    | 259 ± 8 <sup>A</sup>  | 303 ± 16 <sup>A</sup> | 333 ± 24 <sup>A</sup> | 368 ± 31 <sup>A</sup>  | 384 ± 30 <sup>A</sup>  | 410 ± 35 <sup>A</sup>  | 420 ± 33 <sup>AB</sup> |
| LE    | 256 ± 4 <sup>A</sup>  | 307 ± 10 <sup>A</sup> | 340 ± 11 <sup>A</sup> | 376 ± 18 <sup>A</sup>  | 395 ± 14 <sup>A</sup>  | 415 ± 25 <sup>A</sup>  | 428 ± 23 <sup>AB</sup> |
| LN    | 256 ± 6 <sup>A</sup>  | 297 ± 14 <sup>A</sup> | 324 ± 21 <sup>A</sup> | 352 ± 24 <sup>A</sup>  | 374 ± 29 <sup>A</sup>  | 391 ± 29 <sup>A</sup>  | 405 ± 31 <sup>B</sup>  |
|       | week 7                | week 8                | week 9                | week 10                | week 11                | week 12                | week 13                |
| C     | 467 ± 32 <sup>A</sup> | 488 ± 33 <sup>A</sup> | 504 ± 31 <sup>A</sup> | 512 ± 35 <sup>A</sup>  | 525 ± 33 <sup>A</sup>  | 536 ± 37 <sup>A</sup>  | 547 ± 34 <sup>A</sup>  |
| D     | 420 ± 27 <sup>A</sup> | 432 ± 24 <sup>B</sup> | 444 ± 27 <sup>B</sup> | 448 ± 29 <sup>B</sup>  | 471 ± 23 <sup>AB</sup> | 470 ± 34 <sup>B</sup>  | 484 ± 31 <sup>B</sup>  |
| PC    | 436 ± 34 <sup>A</sup> | 443 ± 36 <sup>B</sup> | 461 ± 33 <sup>B</sup> | 467 ± 37 <sup>AB</sup> | 470 ± 40 <sup>B</sup>  | 485 ± 42 <sup>B</sup>  | 489 ± 39 <sup>B</sup>  |
| HE    | 427 ± 32 <sup>A</sup> | 430 ± 33 <sup>B</sup> | 451 ± 36 <sup>B</sup> | 464 ± 32 <sup>B</sup>  | 470 ± 29 <sup>B</sup>  | 474 ± 26 <sup>B</sup>  | 489 ± 30 <sup>B</sup>  |
| HN    | 447 ± 29 <sup>A</sup> | 450 ± 31 <sup>B</sup> | 462 ± 38 <sup>B</sup> | 474 ± 33 <sup>AB</sup> | 487 ± 31 <sup>AB</sup> | 496 ± 27 <sup>AB</sup> | 497 ± 21 <sup>B</sup>  |
| LE    | 437 ± 20 <sup>A</sup> | 441 ± 27 <sup>B</sup> | 456 ± 31 <sup>B</sup> | 475 ± 29 <sup>AB</sup> | 486 ± 26 <sup>AB</sup> | 491 ± 31 <sup>B</sup>  | 502 ± 31 <sup>B</sup>  |
| LN    | 429 ± 27 <sup>A</sup> | 435 ± 29 <sup>B</sup> | 453 ± 34 <sup>B</sup> | 464 ± 36 <sup>B</sup>  | 470 ± 40 <sup>B</sup>  | 477 ± 36 <sup>B</sup>  | 481 ± 34 <sup>B</sup>  |

Data are presented as means ± standard deviation (n=6); C, control; D, DOCA-salt at a dose 25 mg/kg BW; PC, DOCA-salt with administration of lisinopril at a dose 15 mg/kg BW; HE, DOCA-salt with administration of black garlic extract at a dose of 100 mg/kg BW; HN, DOCA-salt with administration of black garlic nanoemulsion at a dose of 100 mg/kg BW; LE, DOCA-salt with administration of black garlic extract at a dose of 50 mg/kg BW; LN, DOCA-salt with administration of black garlic nanoemulsion at a dose of 50 mg/kg BW. Values with different capital letters (A-B) in the same column were significantly different ( $p < 0.05$ ).

**Table S4.** Effect of administration of black garlic extract and nanoemulsion on daily water intake in DOCA-salt induced hypertension and its associated mild cognitive impairment in rats

| group | daily water intake (mL) |                        |                       |                       |                        |                       |                       |
|-------|-------------------------|------------------------|-----------------------|-----------------------|------------------------|-----------------------|-----------------------|
|       | week 0                  | week 1                 | week 2                | week 3                | week 4                 | week 5                | week 6                |
| C     | 52 ± 6 <sup>A</sup>     | 48 ± 5 <sup>B</sup>    | 53 ± 7 <sup>B</sup>   | 54 ± 7 <sup>B</sup>   | 53 ± 7 <sup>C</sup>    | 53 ± 10 <sup>B</sup>  | 50 ± 4 <sup>B</sup>   |
| D     | 50 ± 9 <sup>A</sup>     | 100 ± 21 <sup>A</sup>  | 150 ± 48 <sup>A</sup> | 208 ± 37 <sup>A</sup> | 233 ± 79 <sup>A</sup>  | 218 ± 65 <sup>A</sup> | 203 ± 51 <sup>A</sup> |
| PC    | 48 ± 10 <sup>A</sup>    | 87 ± 25 <sup>A</sup>   | 136 ± 40 <sup>A</sup> | 160 ± 29 <sup>A</sup> | 173 ± 47 <sup>AB</sup> | 200 ± 64 <sup>A</sup> | 190 ± 30 <sup>A</sup> |
| HE    | 51 ± 4 <sup>A</sup>     | 95 ± 24 <sup>A</sup>   | 138 ± 47 <sup>A</sup> | 169 ± 43 <sup>A</sup> | 166 ± 43 <sup>B</sup>  | 198 ± 58 <sup>A</sup> | 185 ± 29 <sup>A</sup> |
| HN    | 56 ± 7 <sup>A</sup>     | 96 ± 43 <sup>A</sup>   | 151 ± 49 <sup>A</sup> | 188 ± 70 <sup>A</sup> | 208 ± 57 <sup>AB</sup> | 192 ± 80 <sup>A</sup> | 183 ± 46 <sup>A</sup> |
| LE    | 54 ± 6 <sup>A</sup>     | 91 ± 19 <sup>A</sup>   | 159 ± 60 <sup>A</sup> | 169 ± 46 <sup>A</sup> | 222 ± 45 <sup>AB</sup> | 238 ± 77 <sup>A</sup> | 202 ± 93 <sup>A</sup> |
| LN    | 55 ± 8 <sup>A</sup>     | 98 ± 27 <sup>A</sup>   | 148 ± 59 <sup>A</sup> | 181 ± 62 <sup>A</sup> | 192 ± 73 <sup>AB</sup> | 192 ± 51 <sup>A</sup> | 200 ± 52 <sup>A</sup> |
|       | week 7                  | week 8                 | week 9                | week 10               | week 11                | week 12               | week 13               |
| C     | 54 ± 12 <sup>B</sup>    | 55 ± 11 <sup>B</sup>   | 54 ± 8 <sup>B</sup>   | 51 ± 12 <sup>B</sup>  | 61 ± 10 <sup>B</sup>   | 56 ± 5 <sup>B</sup>   | 56 ± 6 <sup>B</sup>   |
| D     | 234 ± 65 <sup>A</sup>   | 182 ± 30 <sup>A</sup>  | 201 ± 42 <sup>A</sup> | 200 ± 49 <sup>A</sup> | 212 ± 37 <sup>A</sup>  | 179 ± 54 <sup>A</sup> | 181 ± 23 <sup>A</sup> |
| PC    | 193 ± 37 <sup>A</sup>   | 190 ± 38 <sup>A</sup>  | 201 ± 41 <sup>A</sup> | 189 ± 25 <sup>A</sup> | 198 ± 45 <sup>A</sup>  | 191 ± 46 <sup>A</sup> | 201 ± 69 <sup>A</sup> |
| HE    | 233 ± 37 <sup>A</sup>   | 202 ± 39 <sup>A</sup>  | 198 ± 54 <sup>A</sup> | 188 ± 47 <sup>A</sup> | 189 ± 64 <sup>A</sup>  | 172 ± 29 <sup>A</sup> | 193 ± 52 <sup>A</sup> |
| HN    | 199 ± 65 <sup>A</sup>   | 192 ± 54 <sup>A</sup>  | 183 ± 31 <sup>A</sup> | 184 ± 58 <sup>A</sup> | 192 ± 64 <sup>A</sup>  | 179 ± 33 <sup>A</sup> | 204 ± 58 <sup>A</sup> |
| LE    | 240 ± 103 <sup>A</sup>  | 185 ± 107 <sup>A</sup> | 191 ± 84 <sup>A</sup> | 205 ± 59 <sup>A</sup> | 187 ± 65 <sup>A</sup>  | 182 ± 84 <sup>A</sup> | 192 ± 57 <sup>A</sup> |
| LN    | 195 ± 92 <sup>A</sup>   | 201 ± 49 <sup>A</sup>  | 206 ± 67 <sup>A</sup> | 194 ± 45 <sup>A</sup> | 182 ± 41 <sup>A</sup>  | 180 ± 43 <sup>A</sup> | 195 ± 49 <sup>A</sup> |

Data are presented as means ± standard deviation (n=6); C, control; D, DOCA-salt at a dose 25 mg/kg BW; PC, DOCA-salt with administration of lisinopril at a dose 15 mg/kg BW; HE, DOCA-salt with administration of black garlic extract at a dose of 100 mg/kg BW; HN, DOCA-salt with administration of black garlic nanoemulsion at a dose of 100 mg/kg BW; LE, DOCA-salt with administration of black garlic extract at a dose of 50 mg/kg BW; LN, DOCA-salt with administration of black garlic nanoemulsion at a dose of 50 mg/kg BW. Values with different capital letters (A-B) in the same column were significantly different ( $p < 0.05$ ).

**Table S5.** Effect of administration of black garlic extract and nanoemulsion on the probe test in Morris water maze in DOCA-salt induced hypertension and its associated mild cognitive impairment in rats.

| groups | time in target quadrant (s) | average of other 3 quadrants (s) |
|--------|-----------------------------|----------------------------------|
| C      | 41.66 ± 6.89 <sup>A</sup>   | 15.58 ± 2.30 <sup>B</sup>        |
| D      | 25.51 ± 6.46 <sup>B</sup>   | 21.17 ± 1.70 <sup>A</sup>        |
| PC     | 40.72 ± 10.59 <sup>A</sup>  | 15.76 ± 3.81 <sup>B</sup>        |
| HE     | 37.73 ± 7.41 <sup>A</sup>   | 16.99 ± 2.26 <sup>B</sup>        |
| HN     | 37.97 ± 8.71 <sup>A</sup>   | 16.90 ± 2.58 <sup>B</sup>        |
| LE     | 30.68 ± 11.85 <sup>AB</sup> | 18.31 ± 3.00 <sup>AB</sup>       |
| LN     | 33.39 ± 8.71 <sup>AB</sup>  | 18.51 ± 2.90 <sup>AB</sup>       |

Data are presented as means ± standard deviation (n=6); C, control; D, DOCA-salt at a dose 25 mg/kg BW; PC, DOCA-salt with administration of lisinopril at a dose 15 mg/kg BW; HE, DOCA-salt with administration of black garlic extract at a dose of 100 mg/kg BW; HN, DOCA-salt with administration of black garlic nanoemulsion at a dose of 100 mg/kg BW; LE, DOCA-salt with administration of black garlic extract at a dose of 50 mg/kg BW; LN, DOCA-salt with administration of black garlic nanoemulsion at a dose of 50 mg/kg BW. Values with different capital letter (A-B) in the same column were significantly different ( $p < 0.05$ ).
